# Supplementary material for: Contact evaluation of the penta-PdPSe/graphene vdW heterojunction: tuning the Schottky barrier and optical properties
Source: Royal Society of Chemistry journal article supplement (doi:10.1039/d3cp05589b), 2024-01-01
Supplement: d3cp05589b1.pdf [file d3cp05589b1.pdf]

## Supporting Information

### Contact Evaluation of Penta-PdPSe/Graphene vdW Heterojunction: Tuning the Schottky

#### Barrier and Optical Properties

Arzoo Hassan,<sup>a, b</sup> Yaguang guo,<sup>c</sup> Umer Younis,<sup>a</sup> Andleeb Mehmood,<sup>b</sup> Xiaoqing Tian,<sup>a,\*</sup>

Qian Wang<sup>b,\*</sup>

a College of Physics and Optoelectronic Engineering, Shenzhen University, Shenzhen 518060, China

b School of Materials Science and Engineering, Peking University, Beijing 100871, China

c Department of Physics, School of Physical Science and Engineering, Beijing Jiaotong University, Beijing 100044, China

E-mail: [qianwang2@pku.edu.cn](mailto:qianwang2@pku.edu.cn)

E-mail: [xqtian@szu.edu.cn](mailto:xqtian@szu.edu.cn)

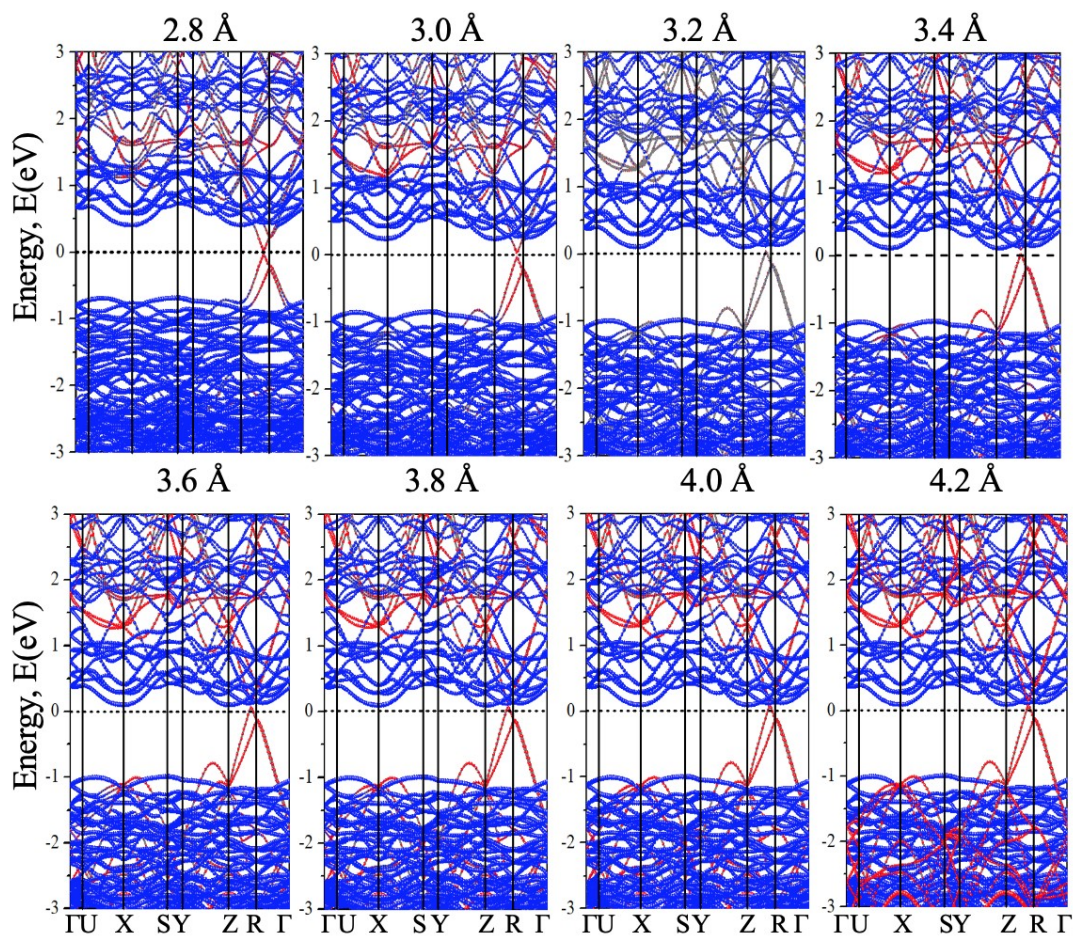

Figure S1: Band structures of PdPSe/Graphene with different interlayer spacing along the vertical direction.

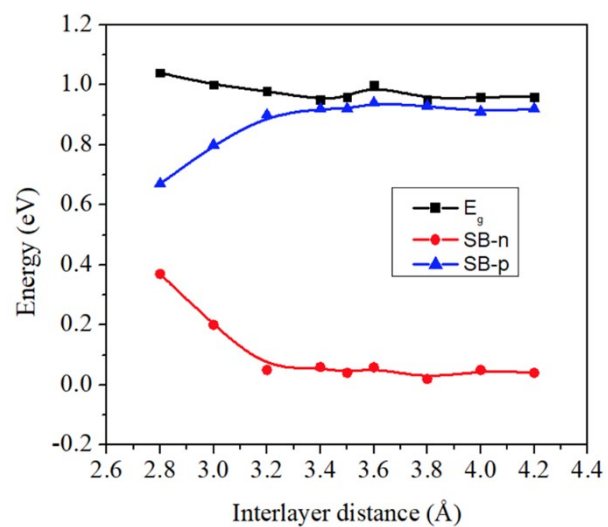

Figure S2: Schottky barrier for electrons (SB-n), holes (SB-p) and sum of Schottky barriers ( $E_g$ ) as a function of interlayer distance for PdPSe/Graphene heterojunction.
